# Supplementary material for: 3,4-Hydroxypyridinone-modified carbon quantum dot as a highly sensitive and selective fluorescent probe for the rapid detection of uranyl ions
Source: Royal Society of Chemistry journal article supplement (doi:10.1039/c9en00148d), 2019-01-01
Supplement: c9en00148d1.pdf [file c9en00148d1.pdf]

*Supporting information*

**3,4-Hydroxypyridinone-Modified Carbon Quantum Dot as a Highly Sensitive and Selective Fluorescence Probe for Rapid Detection of Uranyl Ions**

Zhao Zhang,<sup>‡ab</sup> Duo Zhang,<sup>‡b</sup> Cen Shi,<sup>b</sup> Wei Liu,<sup>b</sup> Lanhua Chen,<sup>b</sup> Yu Miao,<sup>b</sup> Juan Diwu,<sup>\*b</sup> Jianli Li,<sup>\*a</sup> and Shuaowang<sup>\*b</sup>

<sup>a</sup> Ministry of Education Key Laboratory of Synthetic and Natural Functional Molecule Chemistry, College of Chemistry & Materials Science, Northwest University, Xi'an, Shaanxi 710127, P. R. China. E-mail: [lijianli@nwu.edu.cn](mailto:lijianli@nwu.edu.cn)

<sup>b</sup> State Key Laboratory of Radiation Medicine and Protection, School for Radiological and Interdisciplinary Sciences (RAD-X) and Collaborative Innovation Center of Radiation Medicine of Jiangsu Higher Education Institutions, Soochow University, Suzhou 215123, China. E-mail: [diwujuan@suda.edu.cn](mailto:diwujuan@suda.edu.cn), [shuaowang@suda.edu.cn](mailto:shuaowang@suda.edu.cn)

<sup>‡</sup> These two authors contributed equally in this work.

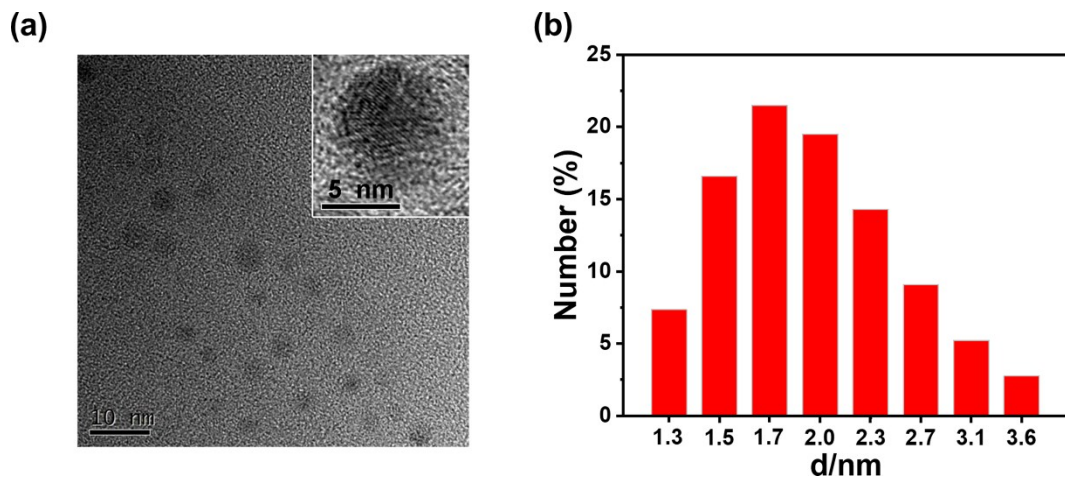

Figure S1. (a) TEM image of BPEI-CQD, inset is the HRTEM image. (b) The size dispersion of BPEI-CQD.

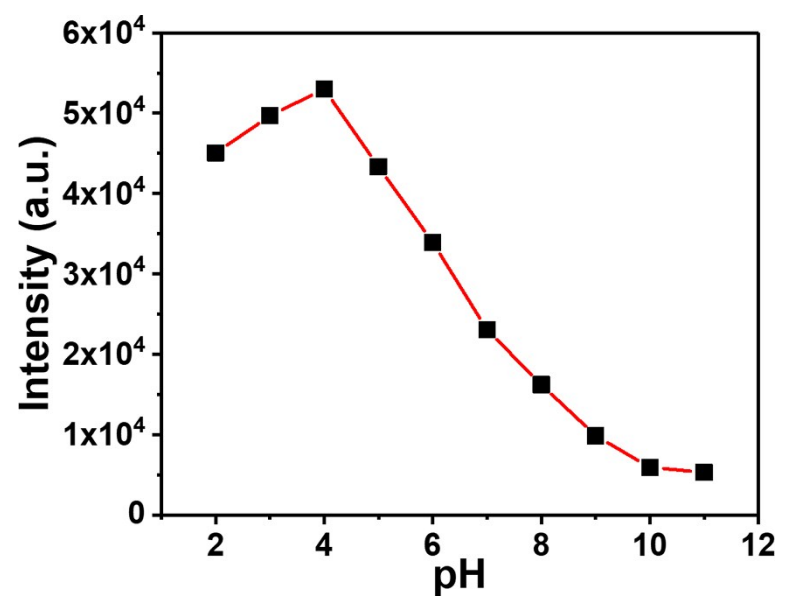

Figure S2. Effect of solution pH on the PL intensity of the BPEI-CQD

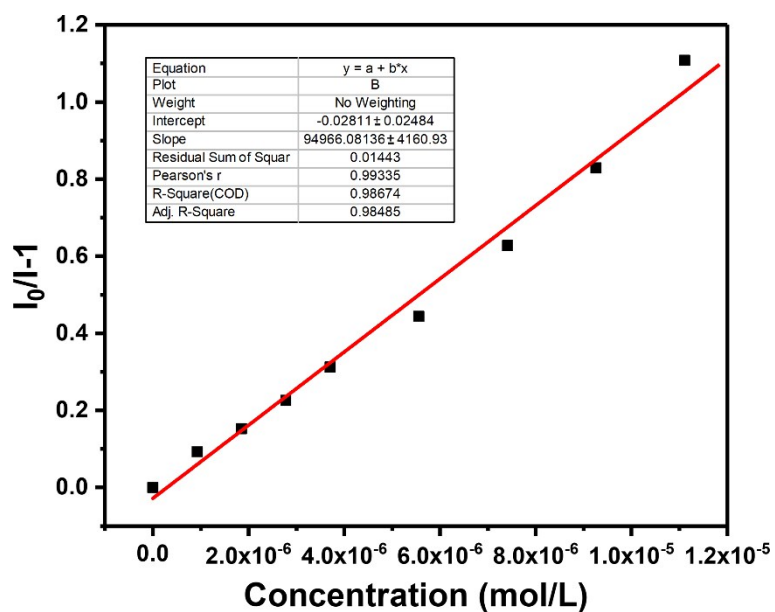

Figure S3. The relationship between  $(I_0/I)-1$  and  $UO_2^{2+}$  concentration for HOPO-CQD.

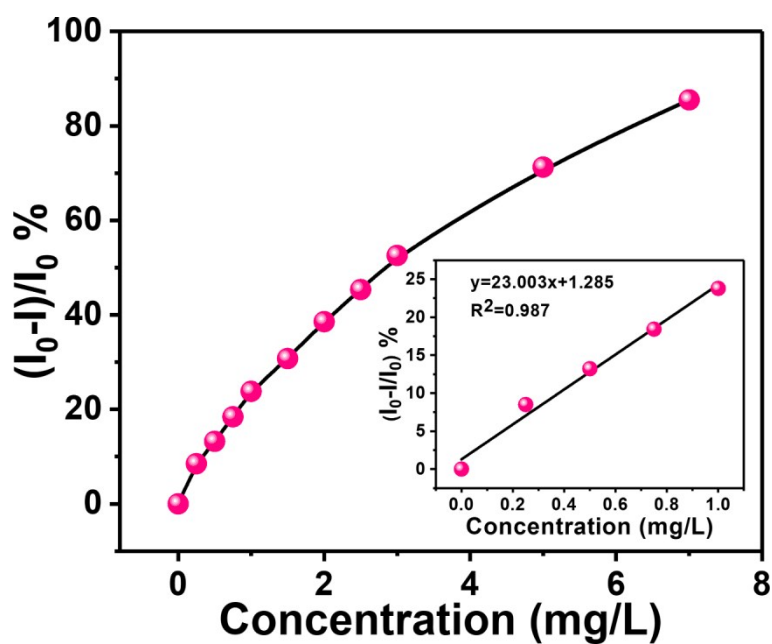

Figure S4. The decrease of fluorescence intensity (measured at 450 nm) of HOPO-CQD as a function of the uranyl concentration, inset is the linear relationship of fitting between  $(I_0-I)/I_0$  and low concentration of uranyl (0 to 1 mg/L).

### Determination of the detection limit

The limit of detection (LOD) for uranyl was determination based on the fluorescence measurement shown in Figure S4. The linear domain in low concentration range can be fitted as

$$y=23.003x+1.285$$

Where y is the relative decrease of fluorescence intensity [ $100 \times (I_0-I)/I_0$ ] measured at 450 nm, and x is the uranyl concentration.

The standard deviation ( $\sigma$ ) is defined as  $100 \times (I_{SE}/I_0)$ , where  $I_{SE}$  is the standard error of the emission measurement, as determined by the baseline measurement of blank samples (monitored at 450 nm),  $I_0$  is the luminescence intensity of HOPO-CQD in deionized water (measured at 450 nm). If defining three times of the standard deviation as the detectable signal, the detection limit can be calculated as  $3\sigma/\text{slope}=0.0065 \text{ mg/L}$ .

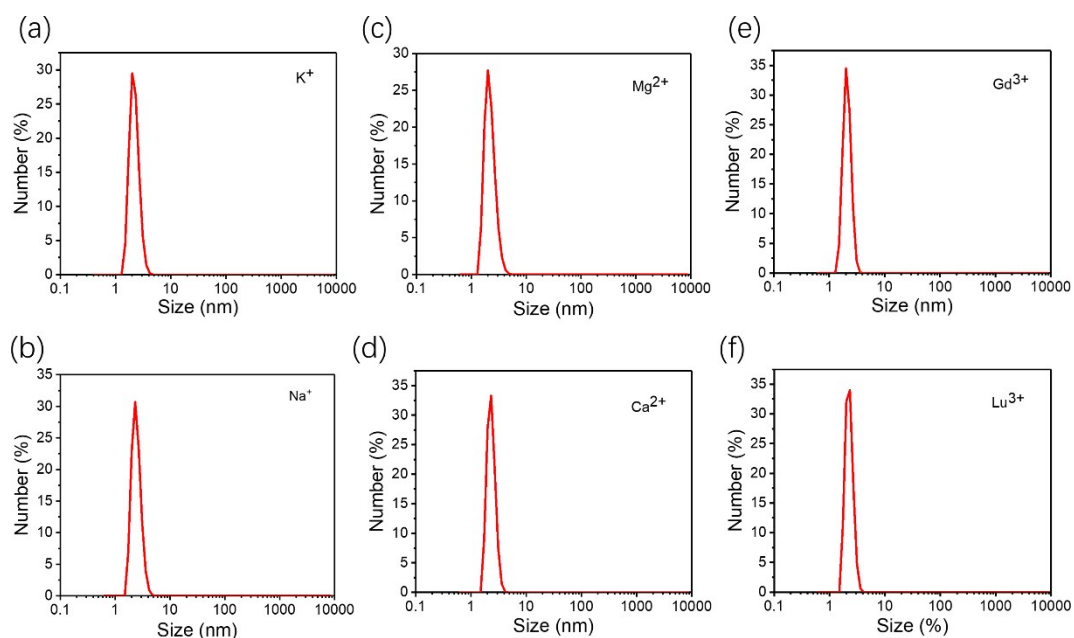

Figure S5. The particle size distribution of HOPO-CQD treated with different metal ions: (a) K<sup>+</sup>, (b) Na<sup>+</sup>, (c) Mg<sup>2+</sup>, (d) Ca<sup>2+</sup>, (e) Gd<sup>3+</sup>, (f) Lu<sup>3+</sup>

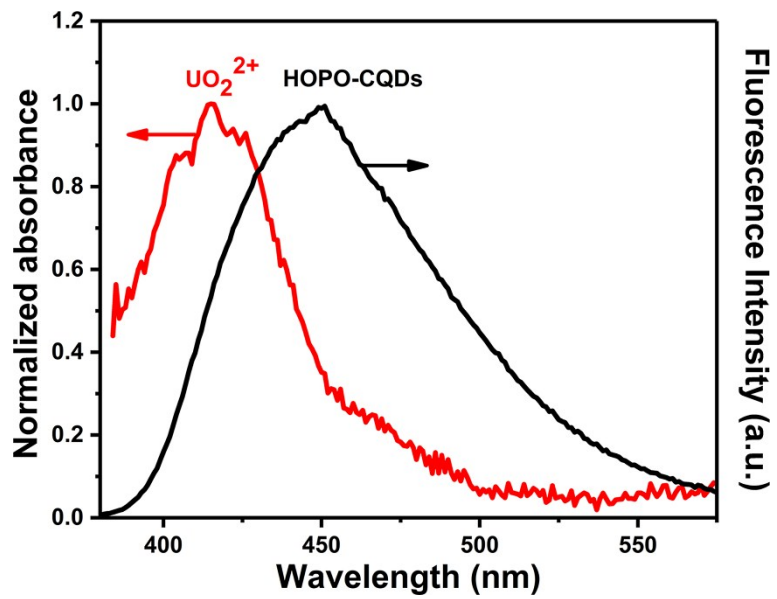

**Figure S6.** UV-Visible absorption spectrum of the uranyl ion and emission spectrum of HOPO-CQD in aqueous solution.
